# Supplementary material for: Low-valent group 6 metals/Al(C6F5)3 donor–acceptor systems for CO2 activation and cleavage
Source: Royal Society of Chemistry journal article supplement (doi:10.1039/d4cc02349h), 2024-01-01
Supplement: d4cc02349h1.pdf [file d4cc02349h1.pdf]

# Supporting Information

*Low-valent Group 6 Metals/ $\text{Al}(\text{C}_6\text{F}_5)_3$  Donor-Acceptor Systems for  $\text{CO}_2$  Activation and Cleavage.*

*Léon Escomel,<sup>a</sup> Quentin Le Dé,<sup>a</sup> Maxime Benonie,<sup>a</sup> Laure Vendier<sup>a</sup> and Antoine Simonneau\*<sup>a</sup>*

[a] LCC-CNRS, Université de Toulouse, CNRS, UPS, 205 route de Narbonne, BP44099, F-31077 Toulouse cedex 4, France.

## Content

|       |                                                                                                                                                                                                 |    |
|-------|-------------------------------------------------------------------------------------------------------------------------------------------------------------------------------------------------|----|
| 1     | Experimental Section.....                                                                                                                                                                       | 2  |
| 1.1   | General Considerations.....                                                                                                                                                                     | 2  |
| 1.2   | Procedure to perform a precise addition of a known number of moles of $\text{CO}_2$ .....                                                                                                       | 2  |
| 1.3   | Synthetic procedures .....                                                                                                                                                                      | 3  |
| 1.3.1 | Synthesis of 2 – <i>cis</i> - $[\text{W}(\text{depe})_2(\text{CO})(\mu\text{-O})\text{Al}(\text{C}_6\text{F}_5)_3]$ .....                                                                       | 3  |
| 1.3.2 | Synthesis of 3 – <i>trans</i> - $[\text{Mo}(\text{depe})_2(\eta^2\text{-CO}_2)\{(\mu\text{-}\eta^2(\text{C},\text{O}):\eta^1(\text{O}))\text{-CO}_2\text{-Al}(\text{C}_6\text{F}_5)_3\}]$ ..... | 3  |
| 1.3.3 | Synthesis of 4 – <i>trans</i> - $[\text{Mo}(\text{depe})_2\{(\mu\text{-}\eta^2(\text{C},\text{O}):\eta^1(\text{O}))\text{-CO}_2\text{-Al}(\text{C}_6\text{F}_5)_3\}_2]$ .....                   | 4  |
| 1.3.4 | Synthesis of 6 - $[\text{Mo}(\text{depe})_2\{(\mu\text{-}\eta^2(\text{C},\text{N}):\eta^1(\text{O}))\text{-PhNCO-Al}(\text{C}_6\text{F}_5)_3\}]$ .....                                          | 4  |
| 2     | NMR spectroscopic data.....                                                                                                                                                                     | 5  |
| 3     | IR spectroscopic data.....                                                                                                                                                                      | 13 |
| 4     | Crystallographic data.....                                                                                                                                                                      | 16 |
| 4.1   | Data collection and refinement .....                                                                                                                                                            | 16 |
| 4.2   | XRD data.....                                                                                                                                                                                   | 16 |
| 5     | References.....                                                                                                                                                                                 | 17 |

# 1 Experimental Section

## 1.1 General Considerations

All reactions were performed in flame- or oven-dried glassware with rigorous exclusion of air and moisture, using a nitrogen filled Jacomex glove box ( $O_2 < 1.0$  ppm,  $H_2O < 1$  ppm). Solvents used were pre-dried (*n*-pentane, toluene, and tetrahydrofuran by passing through a Puresolv MD 7 solvent purification machine; chlorobenzene by distillation over  $CaH_2$ ; benzene by distillation over Na/benzophenone), degassed by freeze-pump-thaw cycles, dried over molecular sieves and stored in the glove box.  $C_6D_6$ ,  $C_6D_5Cl$  and (purchased from Eurisotop) were degassed by freeze-pump-thaw cycles, dried over molecular sieves and stored in the glove box. The M(depe)-dinitrogen (M = Mo, W) complexes,<sup>1-7</sup>  $Al(C_6F_5)_3(tol)$  (**AICF·tol**),<sup>8</sup> *trans*-[W(depe)<sub>2</sub>(N<sub>2</sub>)(μ-N<sub>2</sub>)Al(C<sub>6</sub>F<sub>5</sub>)<sub>3</sub>] (**1<sup>W</sup>**), *trans*-[Mo(depe)<sub>2</sub>(N<sub>2</sub>)(μ-N<sub>2</sub>)Al(C<sub>6</sub>F<sub>5</sub>)<sub>3</sub>] (**1<sup>Mo</sup>**), *cis*-[W(depe)<sub>2</sub>{(μ-N<sub>2</sub>-Al(C<sub>6</sub>F<sub>5</sub>)<sub>3</sub>)<sub>2</sub>}] and *cis*-[Mo(depe)<sub>2</sub>{(μ-N<sub>2</sub>-Al(C<sub>6</sub>F<sub>5</sub>)<sub>3</sub>)<sub>2</sub>}]<sup>9</sup> were prepared according to reported procedures and stored in the glove box. <sup>1</sup>H, <sup>13</sup>C, <sup>19</sup>F and <sup>31</sup>P NMR spectra were recorded using NMR tubes equipped with J. Young valves on a Bruker Avance III 400 spectrometer. Chemical shifts are reported in parts per million (ppm) downfield from tetramethylsilane and are referenced to the most upfield residual solvent resonance as the internal standard in <sup>1</sup>H NMR ( $C_6HD_5$ : δ reported = 7.16 ppm,  $C_6HD_4Cl$ : δ reported = 6.96 ppm, THF-*d*<sub>8</sub>: δ reported = 1.72 ppm). <sup>11</sup>B, <sup>19</sup>F and <sup>31</sup>P NMR spectra were calibrated according to the IUPAC recommendation using a unified chemical shift scale based on the proton resonance of tetramethylsilane as primary reference.<sup>10,11</sup> <sup>1</sup>H and <sup>13</sup>C NMR assignments were confirmed by <sup>1</sup>H-<sup>1</sup>H COSY and <sup>1</sup>H-<sup>13</sup>C HSQC and HMBC experiment if required. Data are reported as follows: chemical shift, multiplicity (b = broad, s = singlet, d = doublet, t = triplet, q = quartet, quint = quintet, h = hextuplet, hept = heptuplet, m = multiplet), coupling constant (Hz), and integration. Infrared (IR) spectra were recorded in the glove box ( $O_2 < 1.0$  ppm,  $H_2O < 1$  ppm) on an Agilent Cary 630 FT-IR spectrophotometer equipped with ATR or transmission modules and are reported in wavenumbers ( $cm^{-1}$ ) with (s), (m), (w) indicating strong, medium, and weak absorption respectively. Elemental analyses were performed on samples sealed in tin capsules under Ar or N<sub>2</sub> by the Analytical Service of the Laboratoire de Chimie de Coordination; results are the average of two independent measurements.

**X-ray structural determinations.** Experimental details regarding XRD measurements are provided in the dedicated section below. CCDC 2355268-2355270 contain the supplementary crystallographic data for this paper. These data are provided free of charge.

## 1.2 Procedure to perform a precise addition of a known number of moles of CO<sub>2</sub>

In cases where a precise addition of the number of moles of carbon dioxide was required, as for the synthesis of **2**, we used the following procedure:

- i) The volume of the headspace of the glassware used (Schlenk flask or NMR tube) was first determined by subtracting the total volume of the system (Schlenk flask or tube) from the volume of the solution (solvent).
- ii) We performed freeze-pump-thaw cycles of the solution and finally put the system and Schlenk lines under dynamic vacuum.
- iii) We switched to static vacuum in the Schlenk lines and closed the system.
- iv) Immediately afterwards, we opened the CO<sub>2</sub> bottle and admitted a precise pressure of carbon dioxide into the vacuum lines (the key is closed to vacuum) using a digital manometer connected to the Schlenk lines. The digital manometer we used is a

Vacuubrand manometer capable of measuring pressures between  $10^{-3}$  and  $10^3$  mbars within a 0.1 mbar precision.

- v) We opened the Schlenk flask or NMR tube (which had returned to room temperature) and carefully adjusted the desired pressure to obtain the desired number of moles in the system using the ideal gas law equation.
- vi) We closed the system.

## 1.3 Synthetic procedures

### 1.3.1 Synthesis of **2** – *cis*-[W(depe)<sub>2</sub>(CO)(μ-O)Al(C<sub>6</sub>F<sub>5</sub>)<sub>3</sub>]

A 3.5 mL colourless solution of Al(C<sub>6</sub>F<sub>5</sub>)<sub>3</sub>(tol) (48 mg, 77 μmol, 1.0 eq.) was added dropwise into a 2.5 mL red toluene solution of [W(depe)<sub>2</sub>(N<sub>2</sub>)<sub>2</sub>] (50 mg, 77 μmol, 1.0 eq.). The resulting purple solution (relating to *in situ* [W(depe)<sub>2</sub>(N<sub>2</sub>)(μ-N<sub>2</sub>)Al(C<sub>6</sub>F<sub>5</sub>)<sub>3</sub>], **1<sup>w</sup>**) was sealed in a 41 mL Schlenk flask. Next, the gas phase was evacuated under vacuum (toluene solution frozen in N<sub>2(l)</sub>). CO<sub>2</sub> gas (136 mbars, 195 μmol, 2.60 eq.) was added in the system at room temperature (ca. 293K). The resulting solution turned deep blue/greenish and was left over stirring at room temperature for 30 minutes. At the beginning of the reaction, some gas evolved (likely decoordination of the N<sub>2</sub> ligands into N<sub>2</sub> gas). The gas phase was evacuated and the Schlenk flask was brought in the N<sub>2</sub>-filled glovebox. The solution was filtered (a small portion of brown solids - ca. 5 mg - were discarded). Afterwards, the filtrate was saturated with 3 mL of *n*-hexanes, and put at T = -40 °C for 3 days which induced the growing of compound **2** as green block-shaped single crystals suitable for an XRD study (50 mg, 56 % yield). Product **2** is only stable in solid-state at low temperature (T = -40 °C). In solution (in C<sub>6</sub>D<sub>6</sub> or C<sub>6</sub>D<sub>5</sub>Cl), it degrades quickly (in one hour) precluding advanced NMR characterisations (<sup>13</sup>C{<sup>1</sup>H} and 2D NMR acquisitions especially). <sup>1</sup>H NMR (400 MHz, C<sub>6</sub>D<sub>6</sub>, 298 K) δ 1.50 (b), 0.87 (b). <sup>19</sup>F NMR (376.2 MHz, C<sub>6</sub>D<sub>6</sub>, 298 K) δ -119.9 (dd, <sup>3</sup>J<sub>F-F</sub>=31 Hz & 10 Hz, 6F, CF<sub>ortho</sub>), -157.5 (t, <sup>3</sup>J<sub>F-F</sub>=21 Hz, 3F, CF<sub>para</sub>), -163.2 (m, 6F, CF<sub>meta</sub>). <sup>31</sup>P{<sup>1</sup>H} NMR (163.2 MHz, C<sub>6</sub>D<sub>6</sub>, 298 K) δ 38.6 (s, 4P). IR-ATR (298 K, cm<sup>-1</sup>) σ 2968 (m, νC-H), 2938 (m, νC-H), 2916 (m, νC-H), 2881 (m, νC-H), 1750 (s, ν(C≡O)), 1636 (m), 1505 (s), 1432 (s). Elemental analysis calcd (%) for C<sub>39</sub>H<sub>48</sub>AlF<sub>15</sub>O<sub>2</sub>P<sub>4</sub>W.0.8(C<sub>6</sub>H<sub>14</sub>)-0.6(C<sub>7</sub>H<sub>8</sub>): C 44.60, H 4.99. Found: C 44.41, H 5.02

### 1.3.2 Synthesis of **3** – *trans*-[Mo(depe)<sub>2</sub>(η<sup>2</sup>-CO<sub>2</sub>){(μ-η<sup>2</sup>(C,O):η<sup>1</sup>(O))-CO<sub>2</sub>-Al(C<sub>6</sub>F<sub>5</sub>)<sub>3</sub>}]

A 5 mL colourless benzene solution of Al(C<sub>6</sub>F<sub>5</sub>)<sub>3</sub>(tol) (46 mg, 74 μmol, 1.0 eq.) was added dropwise into a 5 mL orange benzene solution of *trans*-[Mo(depe)<sub>2</sub>(N<sub>2</sub>)<sub>2</sub>] (42 mg, 74 μmol, 1.0 eq.). The resulting wine/purple solution (relating to *in situ trans*-[Mo(depe)<sub>2</sub>(N<sub>2</sub>)(μ-N<sub>2</sub>-AICF)] adduct, **1<sup>Mo</sup>**) was sealed in a 22 mL Rodaviss Shlenck flask. Next, the solution was reduced to a volume of ca. 8 mL and the gas phase was evacuated (C<sub>6</sub>H<sub>6</sub> frozen in N<sub>2(l)</sub>). Afterwards, dried CO<sub>2</sub> (about 1.2 atm, 0.59 mmol, 8.0 eq.) was added into the stirring benzene solution of **1<sup>Mo</sup>**. Instantly, the solution turned first green (nitrogen evolution noticed) then light orange. The latter was stirred at room temperature for one hour. C<sub>6</sub>H<sub>6</sub> volatiles were removed *in vacuo* yielding crude **3** as a light orange oily foam. A fine orange powder of product **3** was obtained by dissolving the crude foam in 4 mL of *n*-hexanes, then filtrating it in a new 5 mL vial, precipitating it at low temperature (vial put at T = -40 °C for one day), and drying it *in vacuo* for 2 hours (45 mg, 54% yield). Note that using a smaller excess of CO<sub>2</sub> (from 2 to 3 eq.) did not change the reactivity. <sup>1</sup>H NMR (400 MHz, C<sub>6</sub>D<sub>6</sub>, 298 K) δ 2.83 (b), 1.68 (b), 1.43 (b), 1.26 (b), 0.95 (b), 0.67 (b). <sup>19</sup>F NMR (376.2 MHz, C<sub>6</sub>D<sub>6</sub>, 298K) δ -121.4 (dd, <sup>3</sup>J<sub>F-F</sub>=28 Hz & 17 Hz, 6F, CF<sub>ortho</sub>), -154.7 (t, <sup>3</sup>J<sub>F-F</sub>=20 Hz, 3F, CF<sub>para</sub>), -162.7 (m, 6F, CF<sub>meta</sub>). <sup>31</sup>P{<sup>1</sup>H} NMR (163.2 MHz, C<sub>6</sub>D<sub>6</sub>, 298K) δ 49.4 (b, 2P), 40.6 & 39.7 (d & b, 2P). IR-ATR (298K, cm<sup>-1</sup>) σ 2968 (m, νC-H), 2943 (m, νC-H), 2911 (m, νC-H), 2884 (m, νC-H), 1714 (w, ν<sub>sym</sub>η<sup>2</sup>-CO<sub>2</sub>), 1636 (m), 1583 (s, ν<sub>sym</sub>μ-CO<sub>2</sub>), 1505 (s), 1432 (s), 1225 (s, ν<sub>asym</sub>μ-CO<sub>2</sub>), 1194 (s, ν<sub>asym</sub>η<sup>2</sup>-CO<sub>2</sub>). Elemental analysis calcd (%) for C<sub>40</sub>H<sub>48</sub>AlF<sub>15</sub>O<sub>4</sub>P<sub>4</sub>Mo: C 42.72, H 4.30 Found: 40.71, H 4.14.

### 1.3.3 Synthesis of 4 – *trans*-[Mo(depe)<sub>2</sub>{(μ-η<sup>2</sup>(C,O):η<sup>1</sup>(O))-CO<sub>2</sub>-Al(C<sub>6</sub>F<sub>5</sub>)<sub>3</sub>}]<sub>2</sub>

*From adduct 5 (medium-scale reaction).* In a 25 mL Schlenk flask, a 3 mL colourless C<sub>6</sub>H<sub>6</sub> solution of Al(C<sub>6</sub>F<sub>5</sub>)<sub>3</sub>(tol) (44 mg, 71 μmol, 2.0 eq) was added dropwise into a 3 mL orange C<sub>6</sub>H<sub>6</sub> (with 10 drops of C<sub>6</sub>H<sub>5</sub>Cl to solubilize all the starting materials) solution of *trans*-[Mo(depe)<sub>2</sub>(N<sub>2</sub>)<sub>2</sub>] (0.02 g, 36 μmol, 1.0 eq.). The resulting solution turned first green (relating to *trans*-[Mo(depe)<sub>2</sub>(μ-N<sub>2</sub>-AICF)<sub>2</sub>] adduct) then progressively brown/red after 1 hour (relating to the two-fold *cis* adduct **5** - *cis*-[Mo(depe)<sub>2</sub>(μ-N<sub>2</sub>-AICF)<sub>2</sub>]). The Schlenk flask was connected to vacuum lines and the N<sub>2</sub> gas phase was evacuated by freeze-pump thaw (solvent frozen in liquid N<sub>2</sub> and use of dynamic vacuum in the flask). Next, dried CO<sub>2(g)</sub> (1.2 atm, 0.99 mmol, 22 eq) was added to the stirring solution of **5** at room temperature which quickly triggered a colour change from brown to light orange after a few minutes. The resulting solution was left over stirring at room temperature for 17 hours. Solvent volatiles were removed *in vacuo* yielding a crude yellow oil. The latter was triturated with *n*-hexane (*ca.* 4 mL) forming an orange solid in a colourless supernatant. The liquid phase was removed by decantation and filtration and the orange solid was dried *in vacuo* for 1 hour yielding product **5** as a fine orange powder (41.4 mg, 70% yield).

*From complex 3 (NMR-scales reaction).* A 0.4 mL colourless C<sub>6</sub>D<sub>6</sub> solution of Al(C<sub>6</sub>F<sub>5</sub>)<sub>3</sub>(tol) (6.0 mg, 9.7 μmol, 1.0 eq.) was added dropwise into a 0.2 mL orange C<sub>6</sub>D<sub>6</sub> solution of compound **3** (11 mg, 9.6 μmol, 1.0 eq.). The resulting orange solution was sealed in a J-Young NMR tube and analysed by NMR spectroscopy. The latter showed the clean formation of product **4**.

<sup>1</sup>H NMR (400 MHz, C<sub>6</sub>D<sub>6</sub>, 298 K) δ 2.49 (m), 2.20 (m), 2.07 (m), 1.60 (m), 1.30 (m), 1.10 (m), 1.00 (m), 0.88 (m), 0.70 (m), 0.53 (m), 0.43 (m), 0.18 (m). <sup>19</sup>F NMR (376.2 MHz, C<sub>6</sub>D<sub>6</sub>, 298 K) δ -121.61 (dd, <sup>3</sup>J<sub>F-F</sub> = 40.0 & 15.0 Hz, 6F, CF<sub>ortho</sub>), -121.75 (dd, <sup>3</sup>J<sub>F-F</sub> = 40.0 & 15.0 Hz, 6F, CF<sub>ortho</sub>), -153.16 (t, <sup>3</sup>J<sub>F-F</sub>=20 Hz, 3F, CF<sub>para</sub>), -153.19 (t, <sup>3</sup>J<sub>F-F</sub>=20 Hz, 3F, CF<sub>para</sub>), -161.80 (m, 12F, CF<sub>meta</sub>). <sup>31</sup>P{<sup>1</sup>H} NMR (163.2 MHz, C<sub>6</sub>D<sub>6</sub>, 298K) δ 46.7 – 45.9 (m, 1P), 45.2 – 44.4 (m, 1P), 40.4 – 39.2 (m, 2P). IR-ATR (298K, cm<sup>-1</sup>): 2973 (w, νC-H), 2945 (w, νC-H), 2911 (w, νC-H), 2882 (w, νC-H), 1850 (w), 1636 (m), 1575 (s, ν<sub>sym</sub>μ-CO<sub>2</sub>), 1508 (s), 1441 (s), 1227 (s, ν<sub>asym</sub>μ-CO<sub>2</sub>). **Elemental analysis** calcd (%) for C<sub>58</sub>H<sub>48</sub>Al<sub>2</sub>F<sub>30</sub>O<sub>4</sub>P<sub>4</sub>Mo: C 42.15, H 2.93, N 0.00. Found: C 41.85, H 2.78, N 0.06.

### 1.3.4 Synthesis of 6 - [Mo(depe)<sub>2</sub>{(μ-η<sup>2</sup>(C,N):η<sup>1</sup>(O))-PhNCO-Al(C<sub>6</sub>F<sub>5</sub>)<sub>3</sub>}]

A 0.4 mL colourless C<sub>6</sub>D<sub>6</sub> solution of phenyl isocyanate (*ca.* 12 μmol, 1.0 eq.) was added dropwise into a 0.4 mL burgundy C<sub>6</sub>D<sub>6</sub> solution of **1**<sup>Mo</sup> (12 mg, 11 μmol, 1.0 eq.). Instantly, the colour of the solution turned from purple to dark blue. The latter was sealed in a J-Young NMR tube for analysis. After 3 hours, the tube was brought back in the N<sub>2</sub>-filled glovebox. The C<sub>6</sub>D<sub>6</sub> solution of **6** (*ca.* 0.8 mL) was transferred in a 5 mL vial, saturated with 3.5 mL of *n*-pentane, and stored in the freezer (T = -40 °C) for 7 days yielding product **6** as blue single-platelets-like crystals that were recovered by filtration and dried *in vacuo* for 2 hours (10.0 mg, 81% yield). <sup>1</sup>H NMR (400 MHz, C<sub>6</sub>D<sub>6</sub>, 298 K) δ 6.82 (t, <sup>3</sup>J<sub>H-H</sub>=7.6 Hz, 2H, CH<sub>PhNCO</sub>), 6.71 (m, 1H, CH<sub>PhNCO</sub>), 6.68 (m, 2H, CH<sub>PhNCO</sub>), 1.70 (m, 4H, CH<sub>2</sub>), 1.31 (m, 4H, CH<sub>2</sub>), 1.17 (b, 4H, CH<sub>2</sub>), 1.07 (m, 8H, CH<sub>2</sub>), 0.91 (m, 12H, CH<sub>3</sub>), 0.84 (b, 4H, CH<sub>2</sub>), 0.69 (t, <sup>3</sup>J<sub>H-H</sub>=7.4 Hz, 12H, CH<sub>3</sub>). <sup>19</sup>F NMR (376.2 MHz, C<sub>6</sub>D<sub>6</sub>, 298K) δ -121.6 (dd, <sup>3</sup>J<sub>F-F</sub>=28 Hz & 18 Hz, 6F, CF<sub>ortho</sub>), -156.2 (t, <sup>3</sup>J<sub>F-F</sub>=19 Hz, 3F, CF<sub>para</sub>), -163.2 (m, 6F, CF<sub>meta</sub>). <sup>31</sup>P{<sup>1</sup>H} NMR (163.2 MHz, C<sub>6</sub>D<sub>6</sub>, 298 K) δ 75.3 (b). IR-ATR (298 K, cm<sup>-1</sup>) σ 2960 (m, νC-H), 2938 (m, νC-H), 2913 (m, νC-H), 2877 (m, νC-H), 1637 (m), 1593 (m), 1535 (m), 1506 (s), 1441 (s), 1301 (s). **Elemental analysis** calcd (%) for C<sub>45</sub>H<sub>53</sub>AlF<sub>15</sub>ONP<sub>4</sub>Mo: C 46.77, H 4.62, N 1.21. Found: C 44.46, H 5.06, N 1.31

## 2 NMR spectroscopic data

**Figure S1.**  $^1\text{H}$  NMR spectrum (400 MHz,  $\text{C}_6\text{D}_6$ , 298 K) of compound **2**.

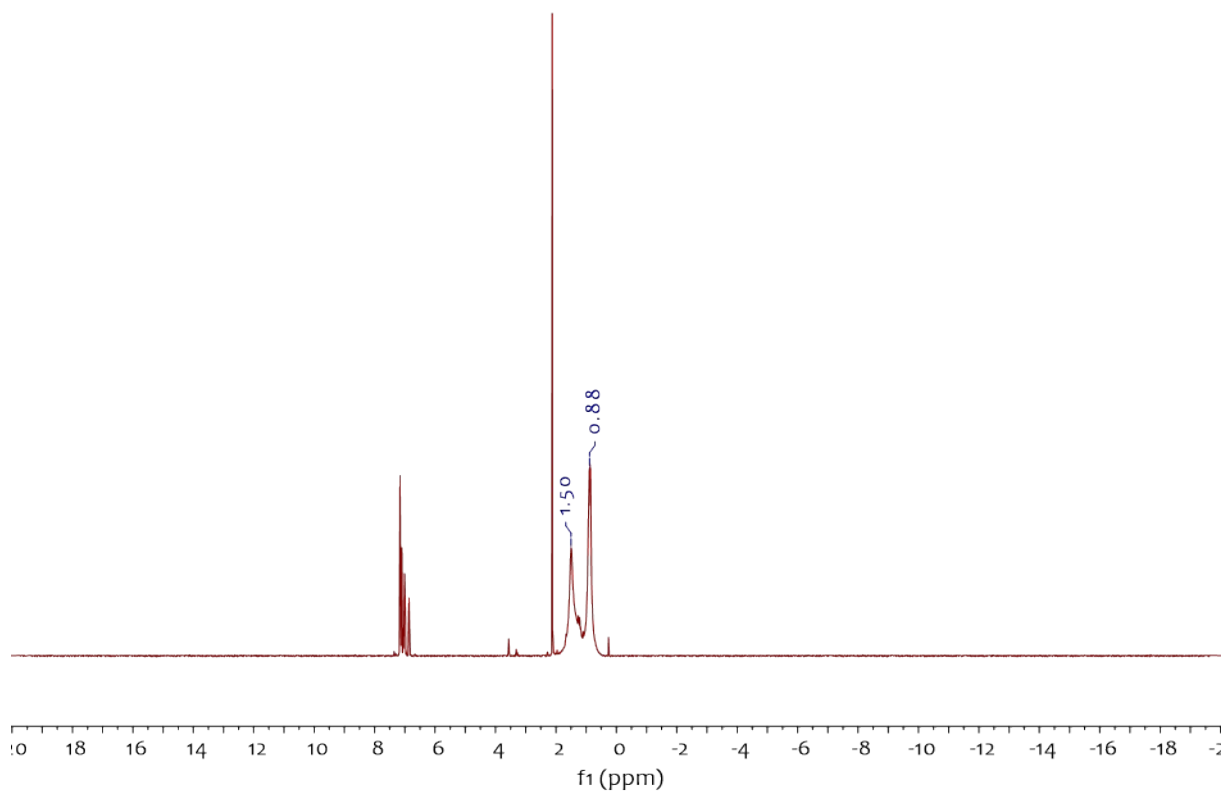

**Figure S2.**  $^{19}\text{F}$  NMR spectrum (376.2 MHz,  $\text{C}_6\text{D}_6$ , 298 K) of compound **2**.

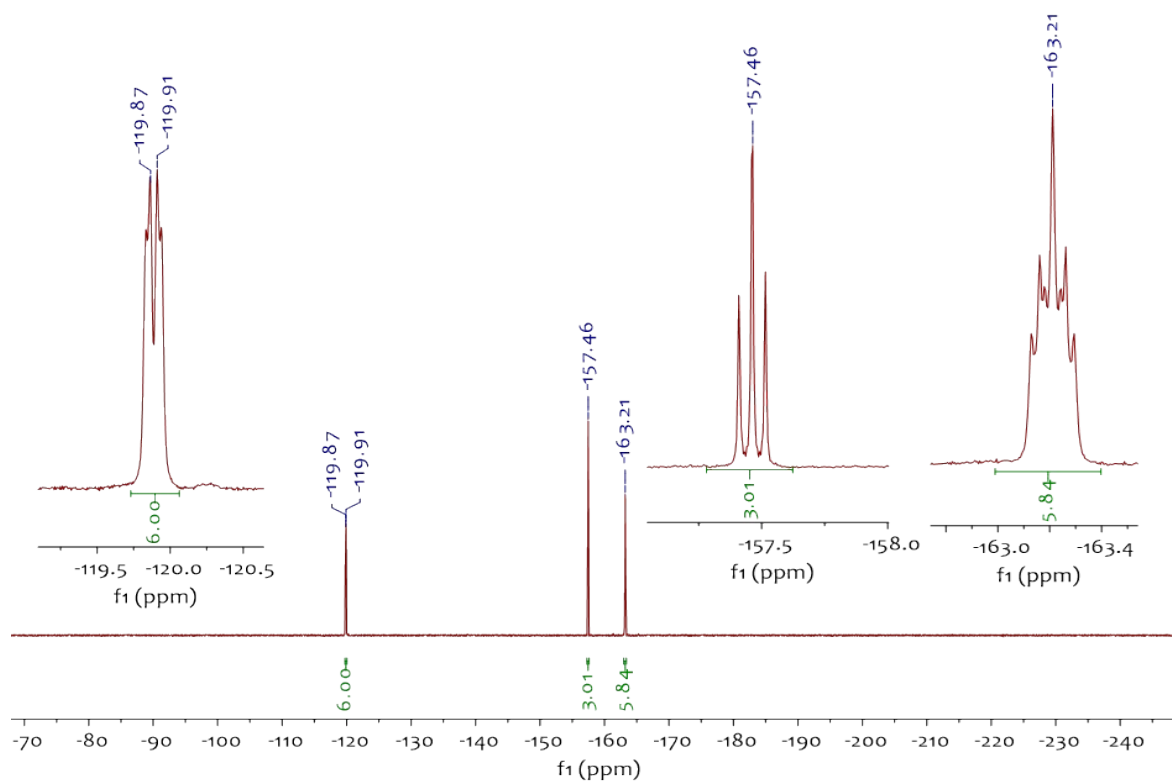

**Figure S3.**  $^{31}\text{P}\{^1\text{H}\}$  NMR spectrum (163.2 MHz,  $\text{C}_6\text{D}_6$ , 298 K) of compound **2**.

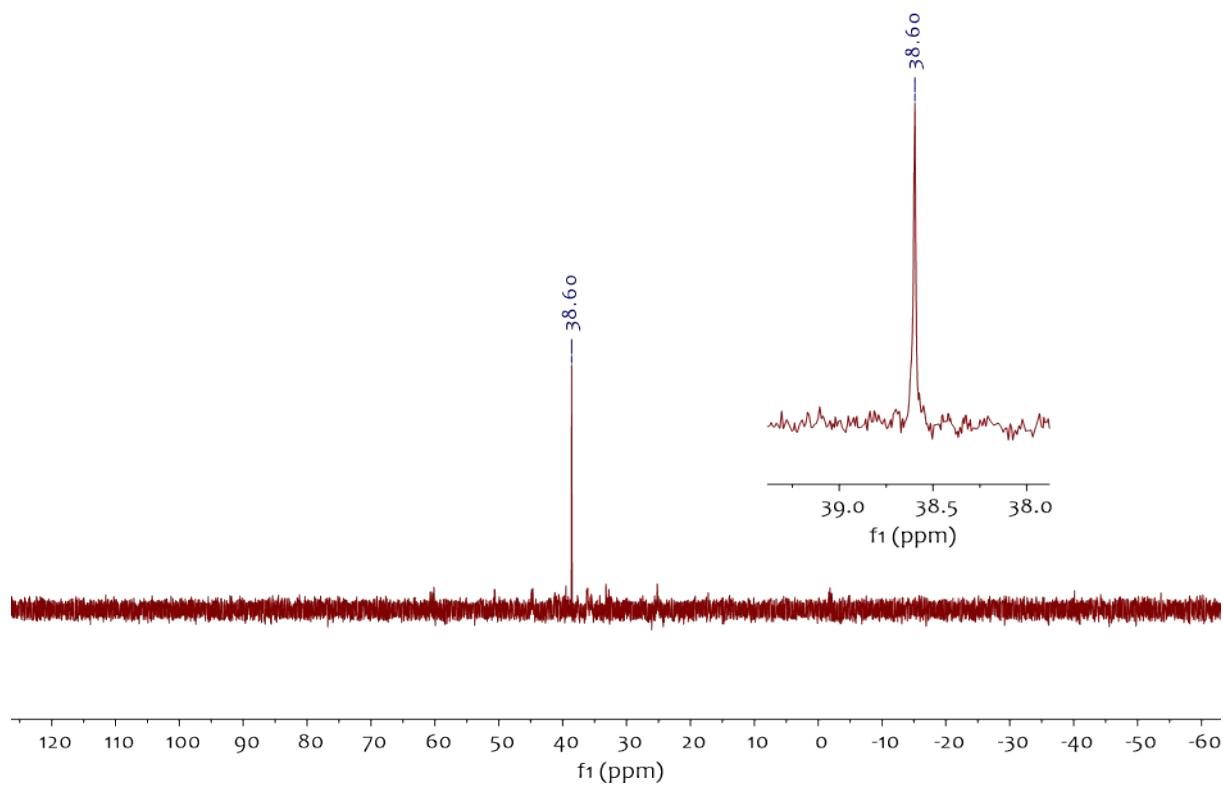

**Figure S4.**  $^1\text{H}$  NMR spectrum (400 MHz,  $\text{C}_6\text{D}_6$ , 298 K) of compound **3**.

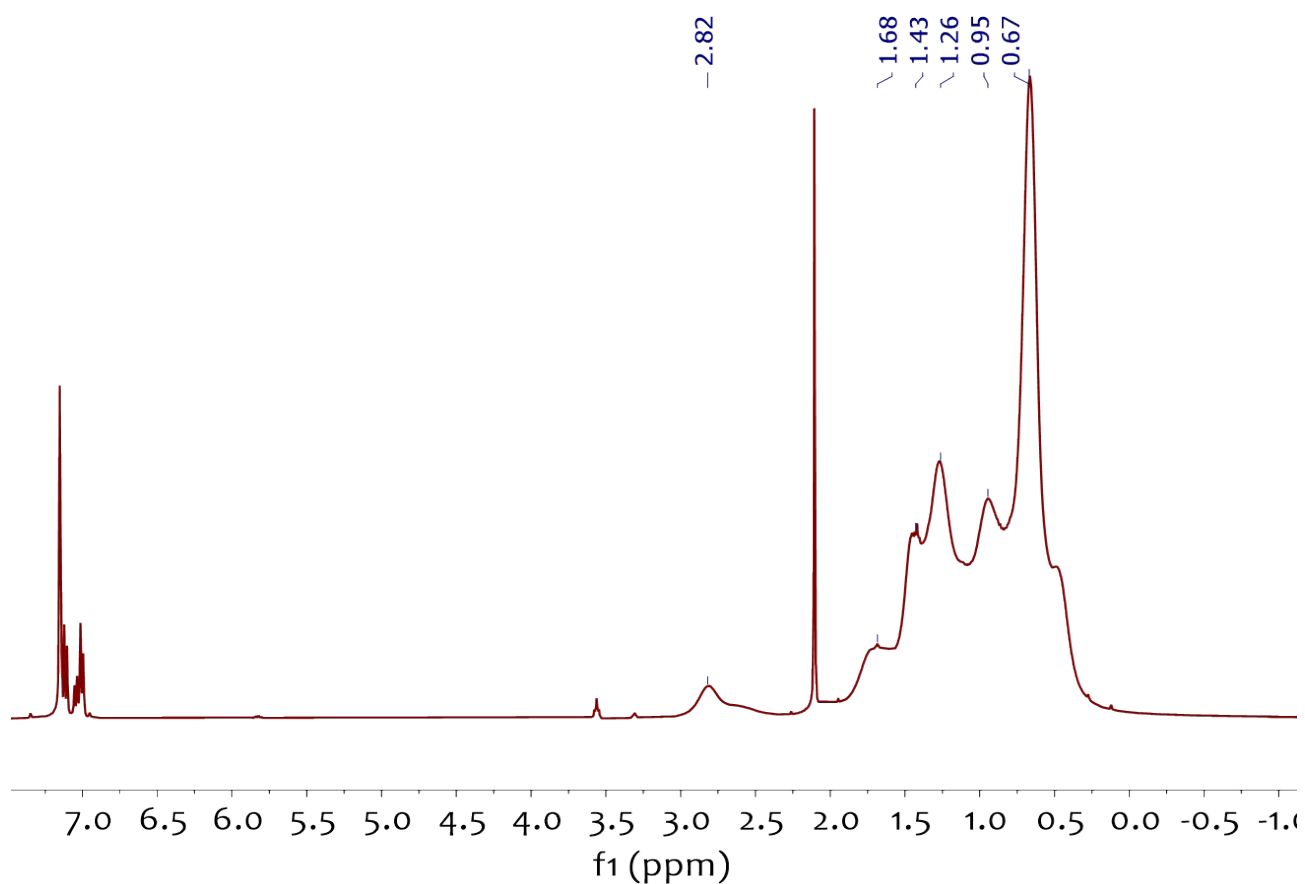

Figure S5.  $^{19}\text{F}$  NMR spectrum (376.2 MHz,  $\text{C}_6\text{D}_6$ , 298 K) of compound **3**.

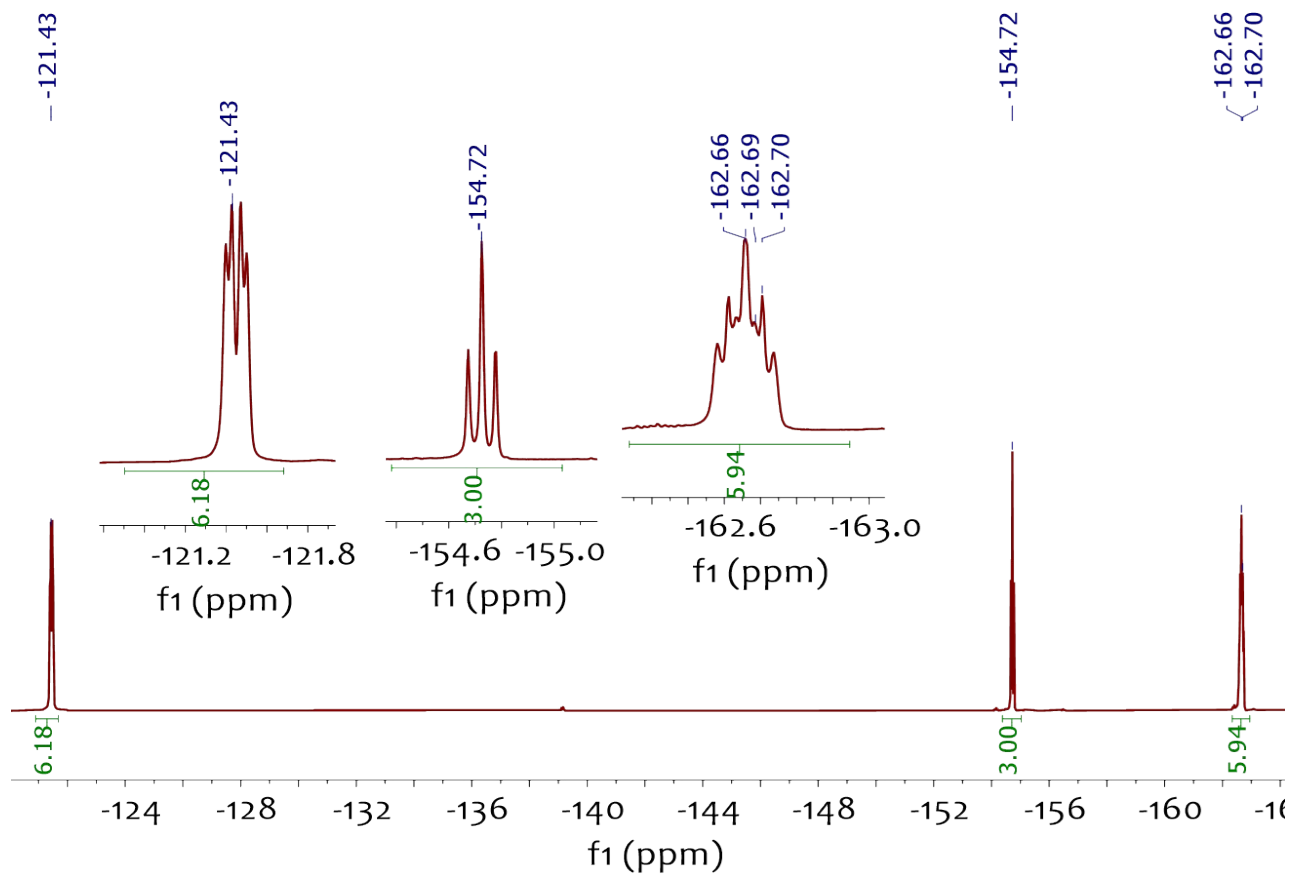

Figure S6.  $^{31}\text{P}\{^1\text{H}\}$  NMR spectrum (163.2 MHz,  $\text{C}_6\text{D}_6$ , 298 K) of compound **3**.

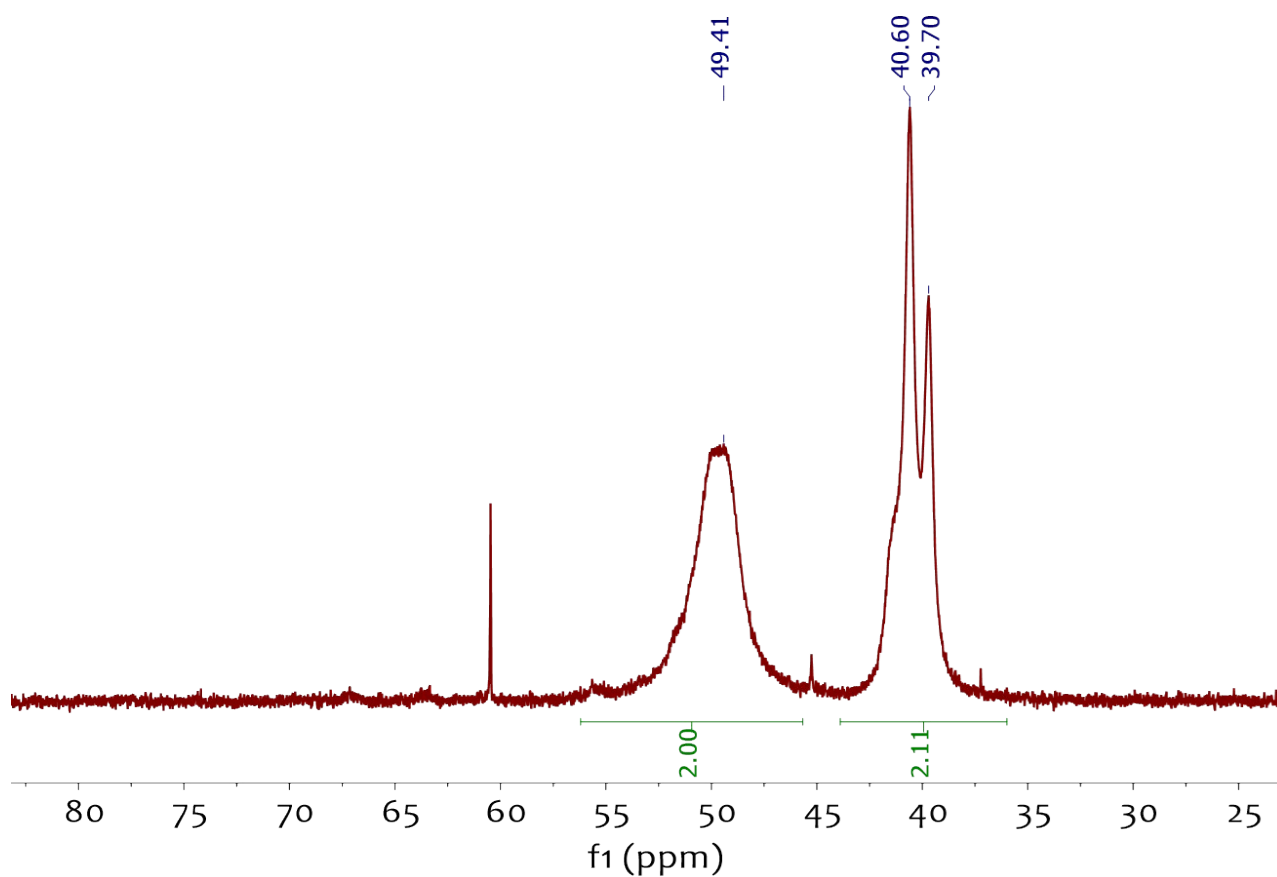

**Figure S7.**  $^1\text{H}$  NMR spectrum (400 MHz,  $\text{C}_6\text{D}_6$ , 298 K) of compound **4**.

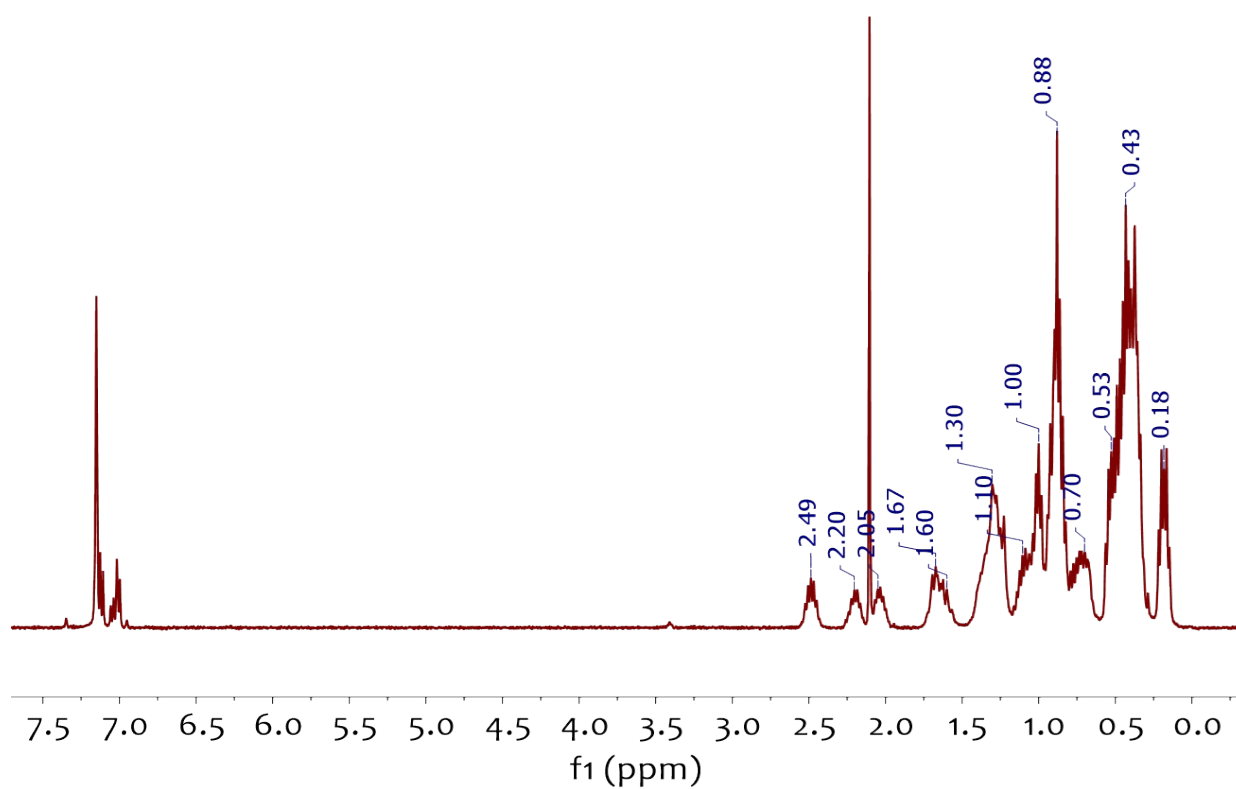

**Figure S8.**  $^{19}\text{F}$  NMR spectrum (376.2 MHz,  $\text{C}_6\text{D}_6$ , 298 K) of compound **4** (C=19 mmol/L)



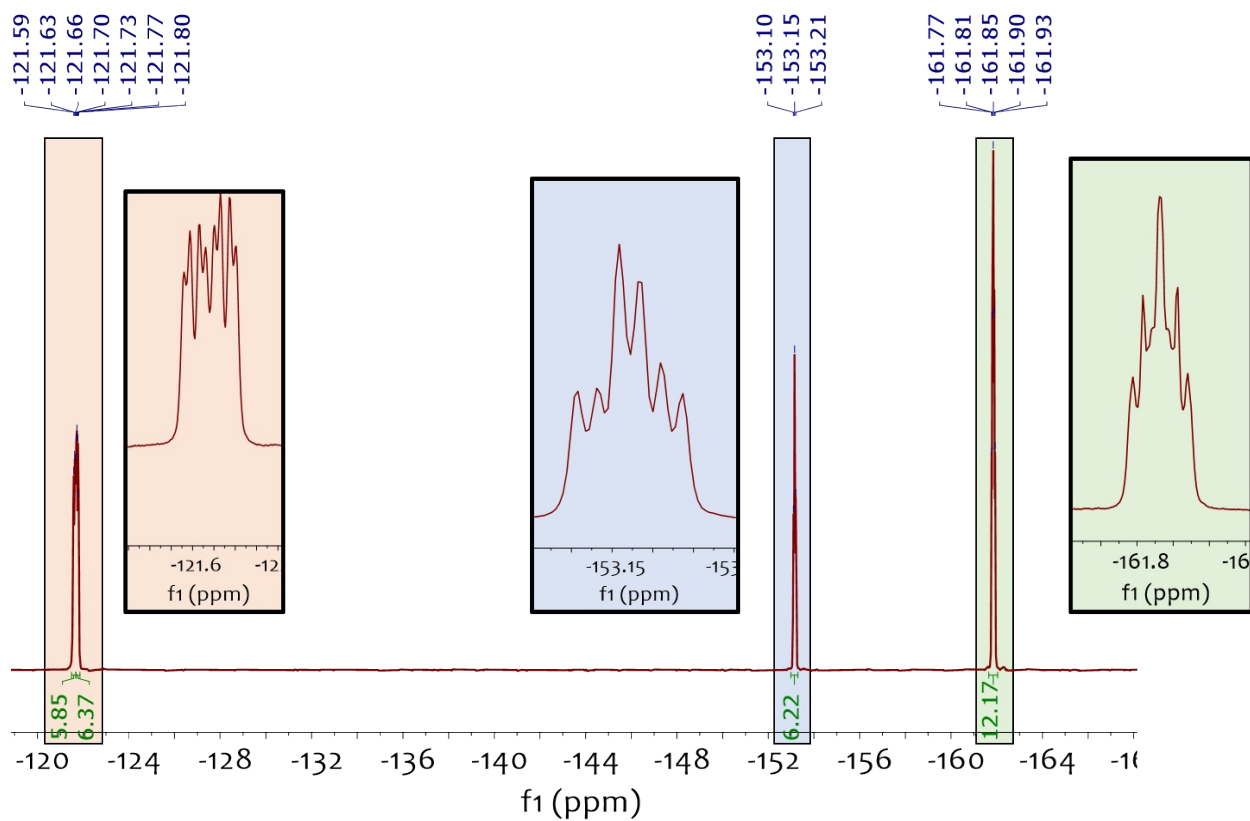

**Figure S9.**  $^{31}\text{P}\{^1\text{H}\}$  NMR spectrum (163.2 MHz,  $\text{C}_6\text{D}_6$ , 298 K) of compound **4**.

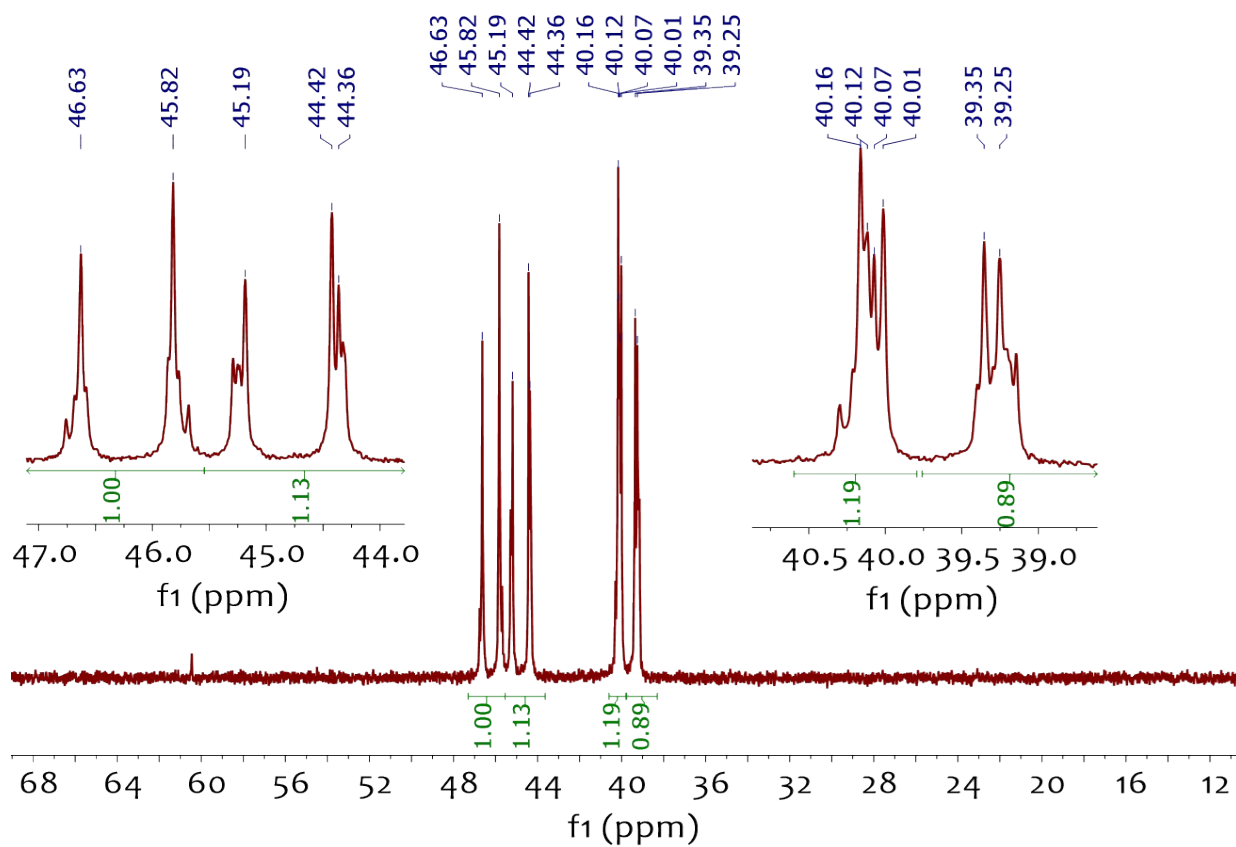

**Figure S10.** VT- $^1\text{H}$  NMR spectra (400 MHz,  $\text{C}_6\text{D}_6$ ) of compound **4** showing a total coalescence from  $T=348\text{K}$  (three symmetrical depe signals)

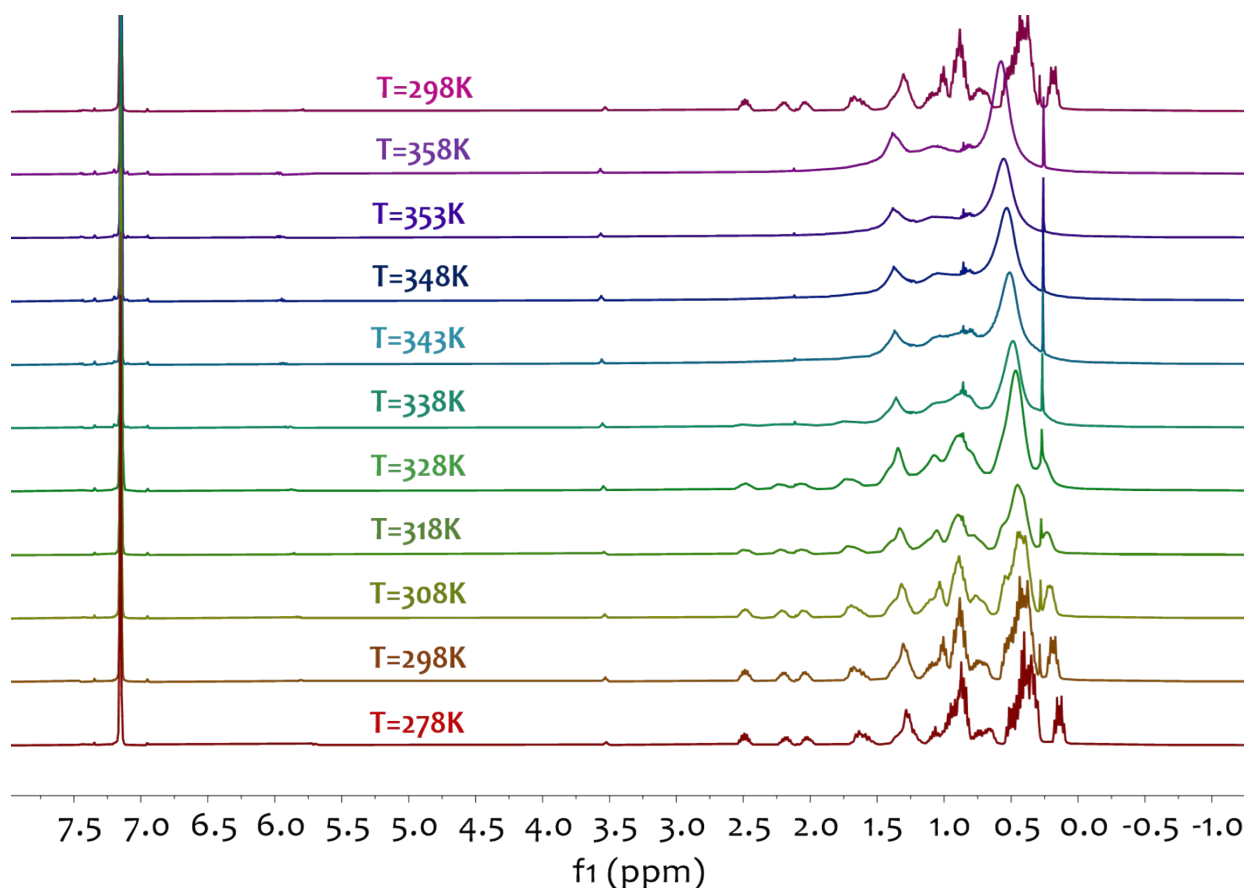

**Figure S11.** VT- $^{31}\text{P}\{^1\text{H}\}$ - NMR spectra (400 MHz,  $\text{C}_6\text{D}_6$ ) of compound **4** that displays a coalescence (from six signals into two broad signals) at T=358K.

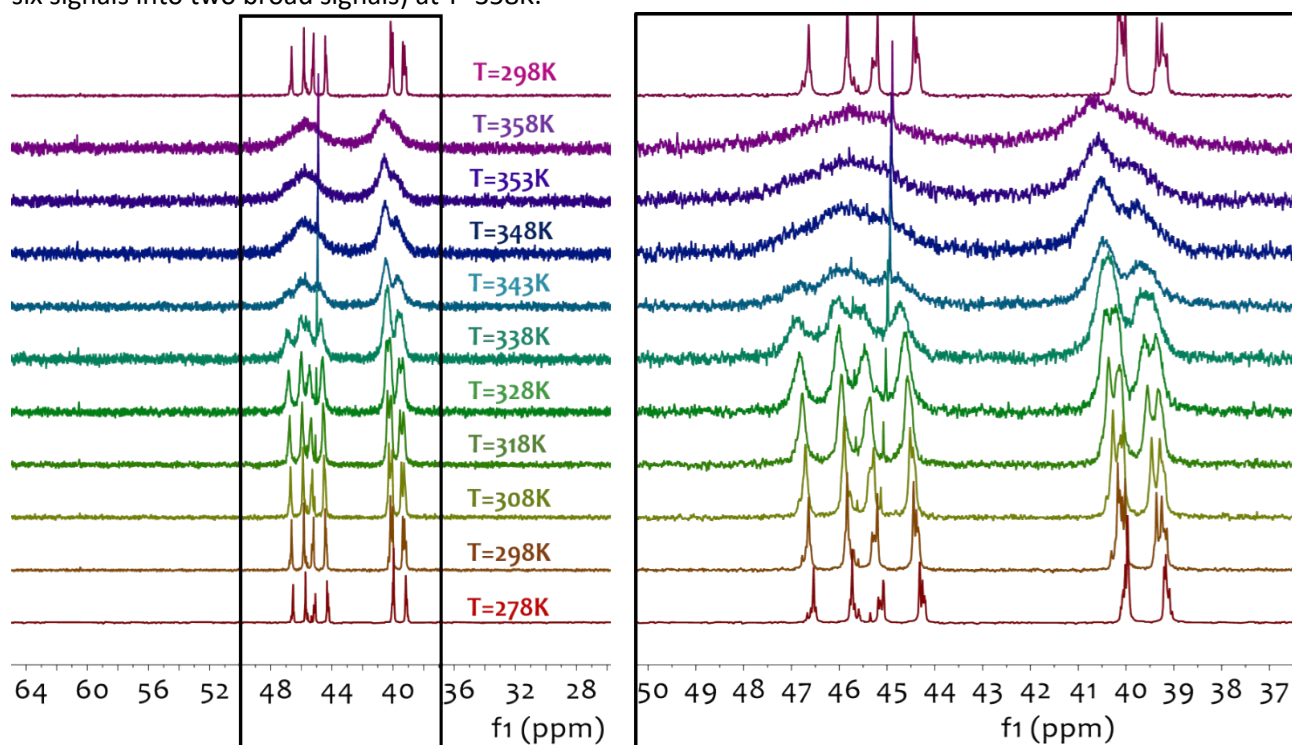

**Figure S12.** VT- $^{19}\text{F}$ - NMR spectra (400 MHz,  $\text{C}_6\text{D}_6$ ) of compound **4** showing no notable effects of the temperature. The first two spectra (bottom) represent the same compound at two different concentrations (19 mM vs 14 mM) at T=298K. When the concentration increases, we observed a

decoalescence of the *ortho* and *para* signals into two resonances. This phenomenon is attributed to an intermolecular  $\pi$ -stacking of the AICF perfluoroaryl rings.

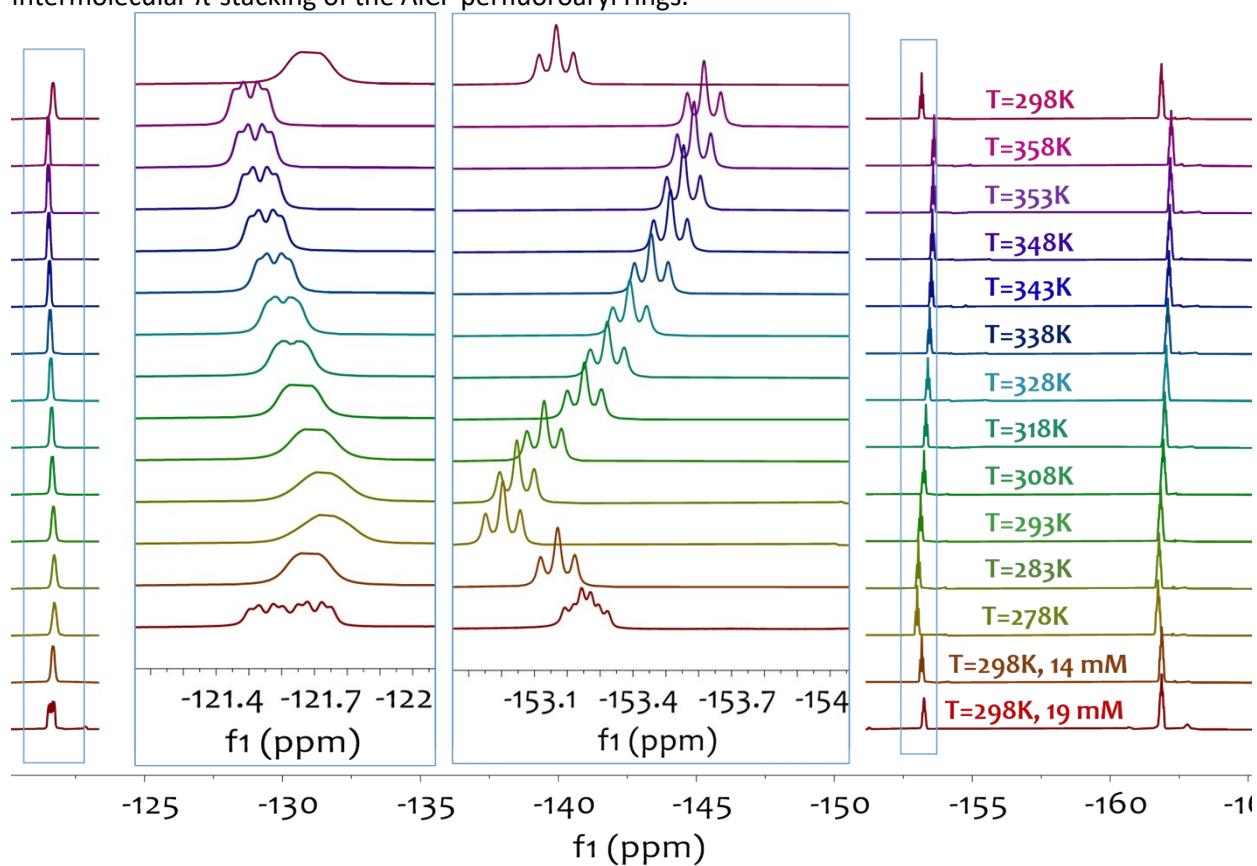

**Figure S13.**  $^1\text{H}$  NMR spectrum (400 MHz,  $\text{C}_6\text{D}_6$ , 298 K) of compound **6**.

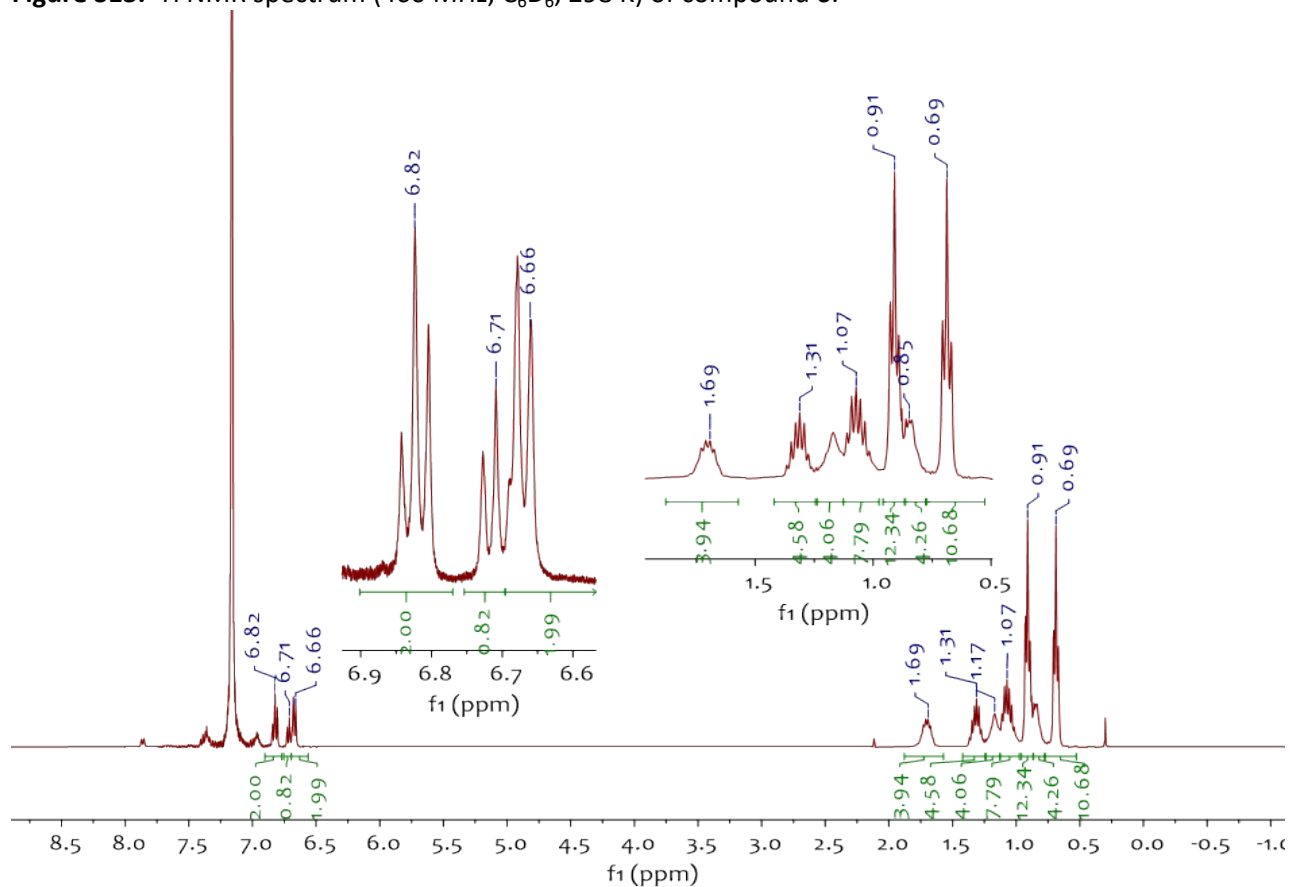

**Figure S14.**  $^{19}\text{F}$  NMR spectrum (376.2 MHz,  $\text{C}_6\text{D}_6$ , 298 K) of compound **6**.

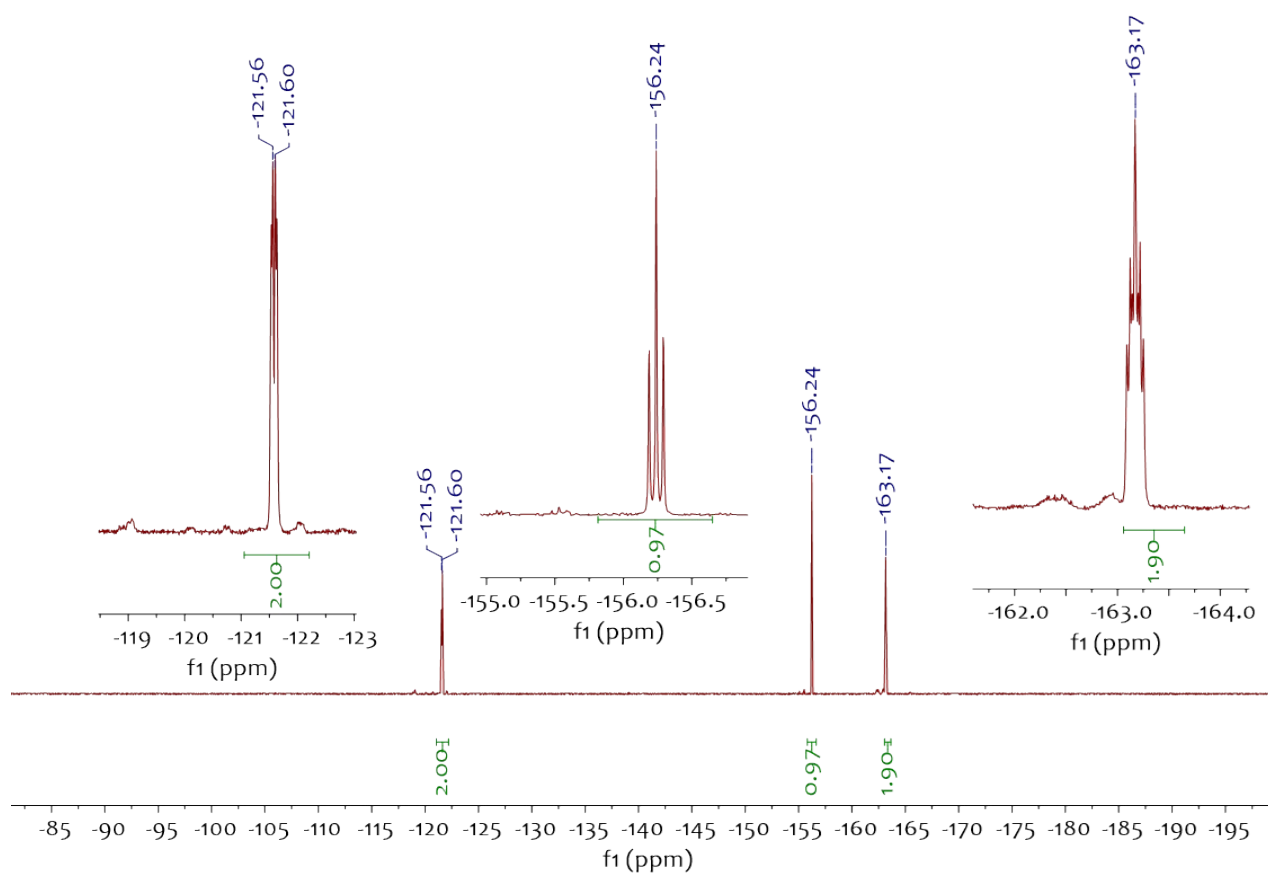

**Figure S15.**  $^{31}\text{P}\{^1\text{H}\}$  NMR spectrum (163.2 MHz,  $\text{C}_6\text{D}_6$ , 298 K) of compound **6**.

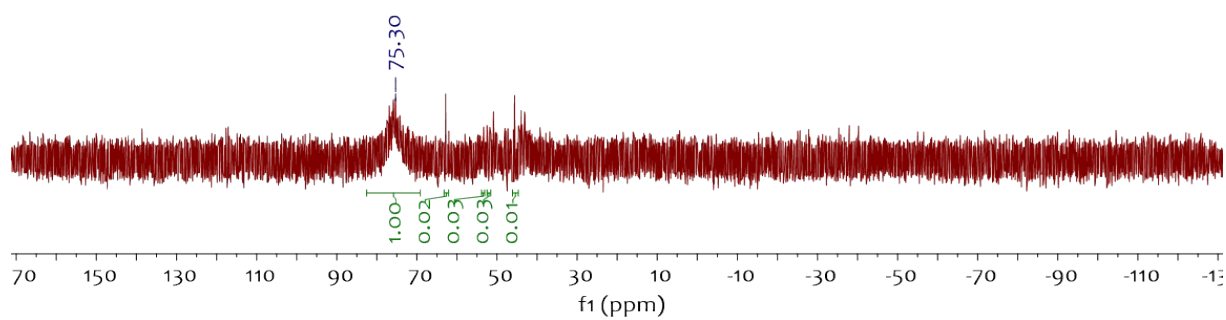

### 3 IR spectroscopic data

Figure S16. ATR spectrum (298 K, under nitrogen) of compound 2.

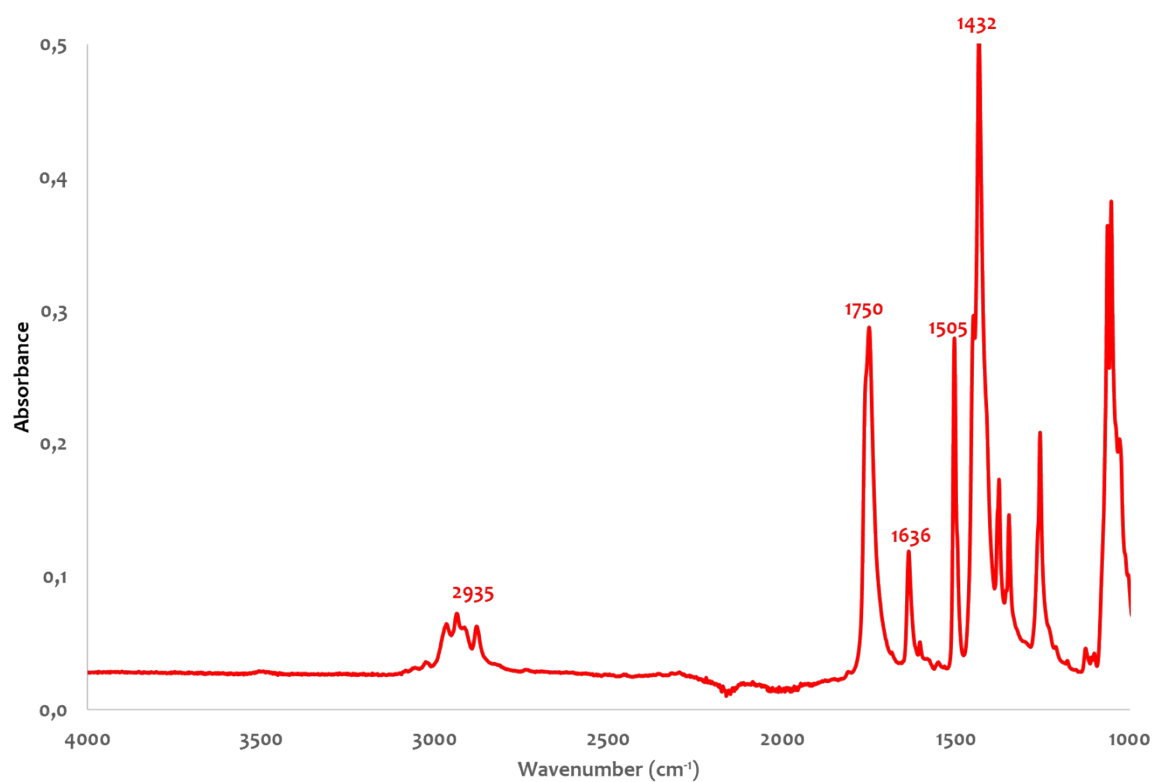

Figure S17. ATR spectrum (298 K, under nitrogen) of compound 3.

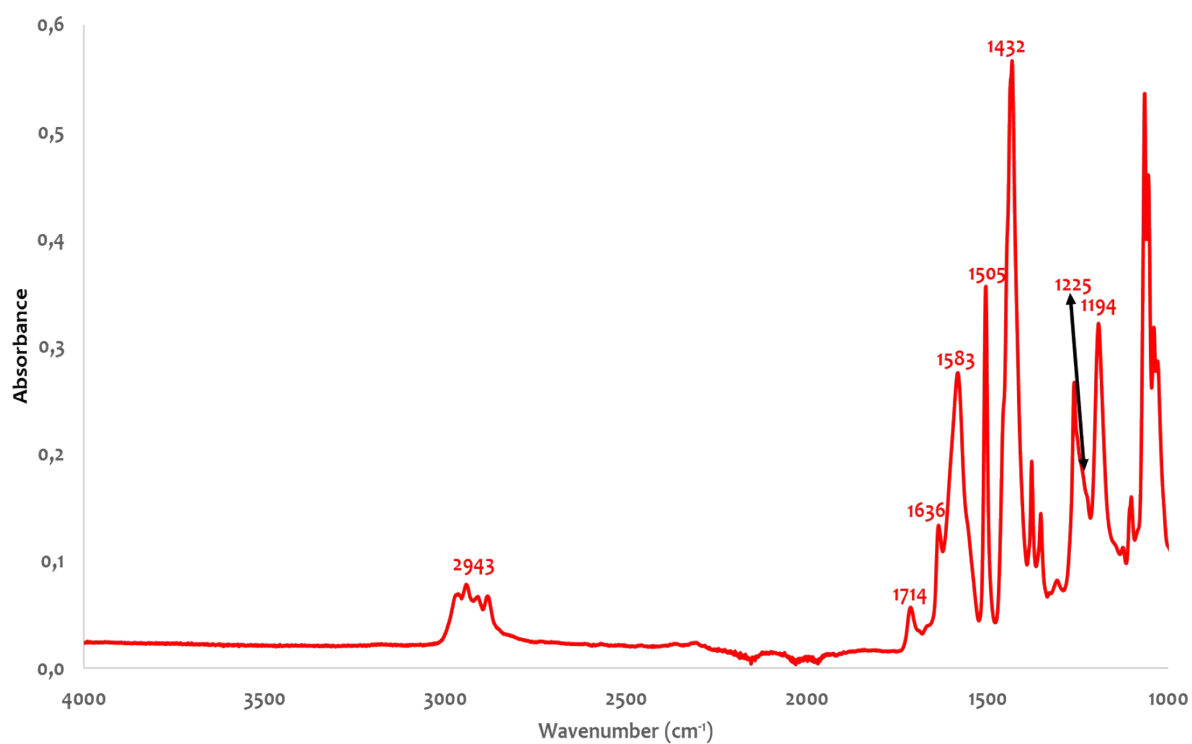

**Figure S18.** ATR spectrum (298 K, under nitrogen) of compound **4**.

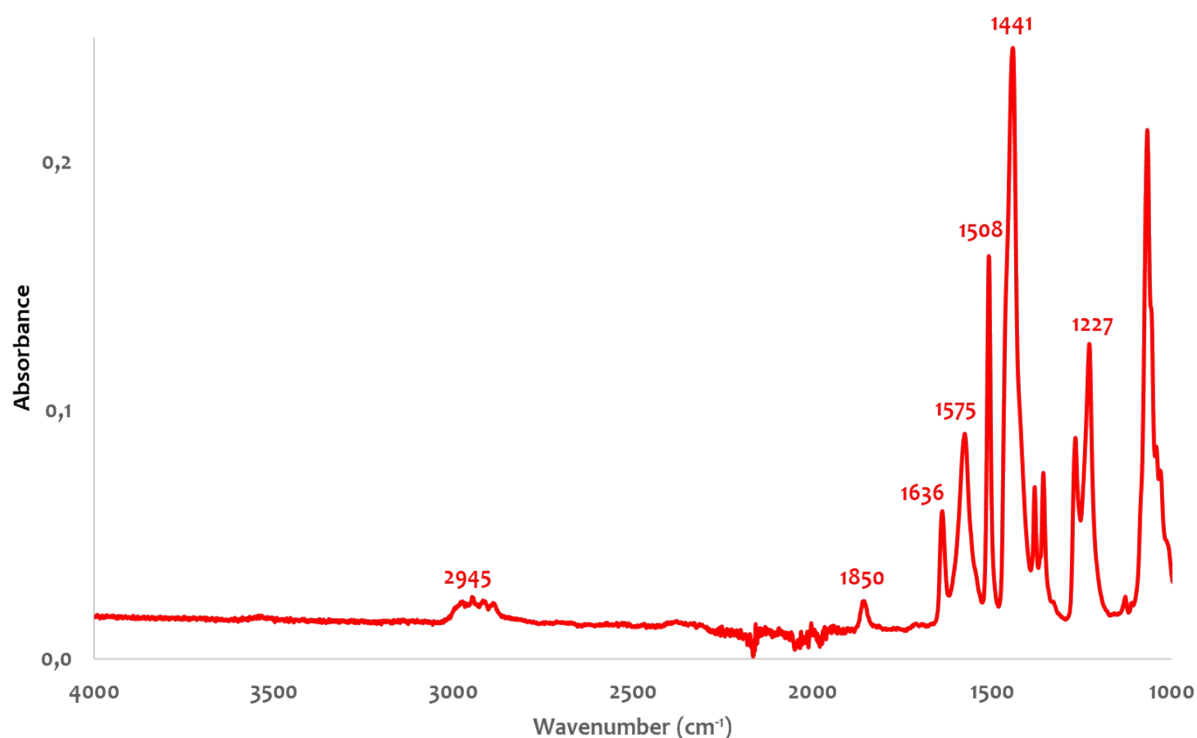

**Figure S19.** Stacked ATR spectra (298 K, under nitrogen) of compound **4** (top) vs **3** (middle) vs **1<sup>Mo</sup>** (bottom) in the [2000-1000  $\text{cm}^{-1}$ ] window. The symmetric and asymmetric  $\eta^2\text{-CO}_2$  stretches of **3** (1714 and 1194  $\text{cm}^{-1}$  respectively) were assigned using literature data on similar  $\eta^2\text{-CO}_2\text{-Mo}$  complexes and *via* its superimposition with the starting precursor **1<sup>Mo</sup>**.<sup>12-14</sup> Similarly, the symmetric and asymmetric  $\mu\text{-}\eta^2(\text{C,O}):\eta^1(\text{O})\text{-CO}_2$  (bridging  $\text{CO}_2$  between Mo and **AICF**) stretches of **3** and **4** (1575 and 1227  $\text{cm}^{-1}$  respectively) were assigned using IR literature data on a similar Mo- $\mu\text{-CO}_2\text{-LA}$  (LA = Lewis Acid) complex and *via* its superimposition with the starting precursor **1<sup>Mo</sup>**.<sup>13</sup>

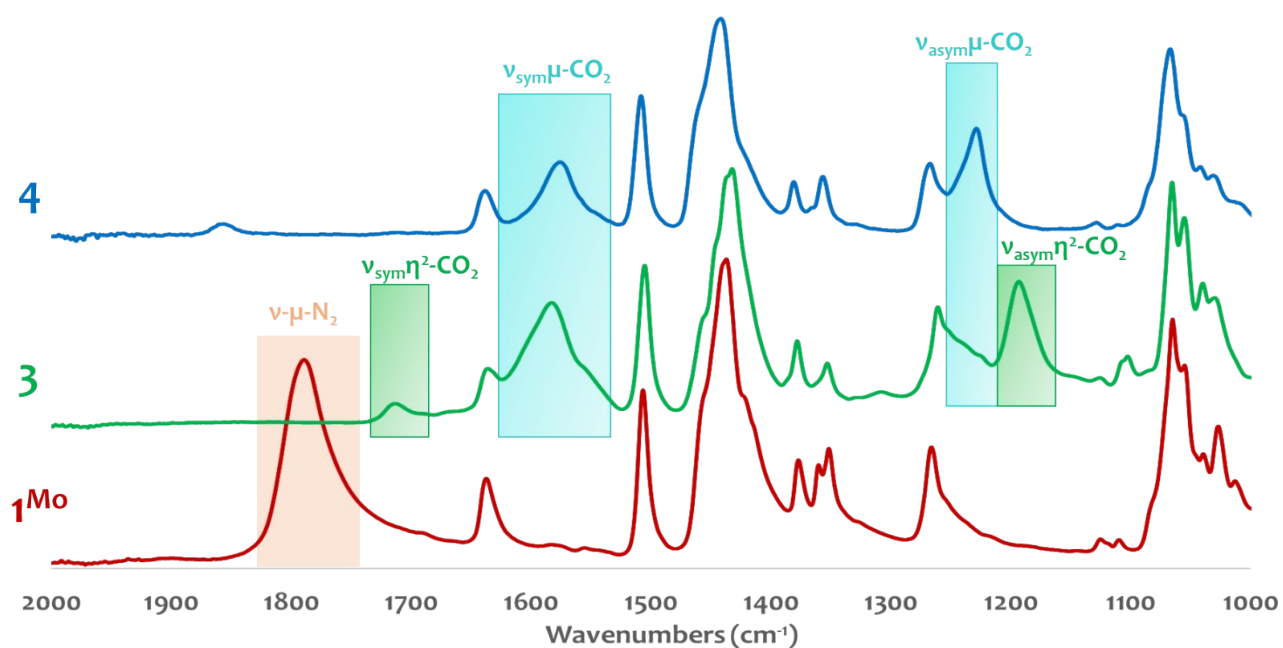



**Figure S20.** ATR spectrum (298 K, under nitrogen) of compound **6**.

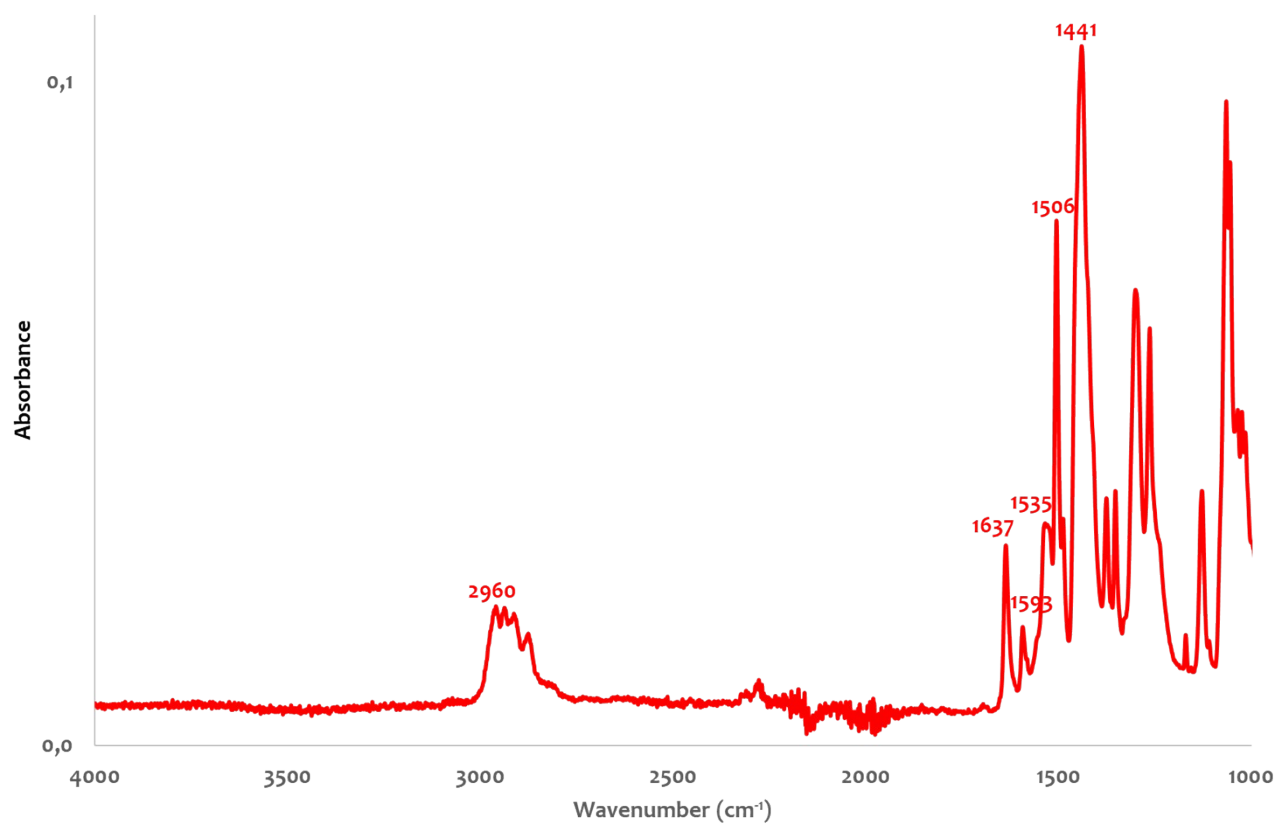



## 4 Crystallographic data

### 4.1 Data collection and refinement

Data for compounds **2**, **4**, and **6** were collected at low temperature (100 K) on a XtaLAB Synergy, Dualflex, HyPix diffractometer using a Mo-K $\alpha$  radiation ( $\lambda = 0.71073\text{\AA}$ ) micro-source and equipped with an Oxford Cryosystems Cryostream Cooler Device. The structures have been solved by Direct Methods and refined by means of least-squares procedures using the SHELXS97<sup>15</sup> program included in the softwares package WinGX version 1.63<sup>16</sup> or with the aid of the software package Crystal<sup>17</sup>. The Atomic Scattering Factors were taken from International tables for X-Ray Crystallography<sup>18</sup>. Hydrogen atoms were placed geometrically and refined using a riding model. All non-hydrogens atoms were anisotropically refined. Drawing of molecules in the following figures were performed with the program Mercury<sup>19</sup> with 30% probability displacement ellipsoids for non-hydrogen atoms. The crystal structures have been deposited at the Cambridge Crystallographic Data Centre and allocated the deposition numbers CCDC 2355268–2355270.

### 4.2 XRD data

Table S1. XRD data for compounds **2**, **4**, and **6**.

| Compound                                         | <b>2</b>                                                                                                            | <b>4</b>                                                                                        | <b>6</b>                                                             |
|--------------------------------------------------|---------------------------------------------------------------------------------------------------------------------|-------------------------------------------------------------------------------------------------|----------------------------------------------------------------------|
| Formula                                          | C <sub>39</sub> H <sub>48</sub> AlF <sub>15</sub> O <sub>2</sub> P <sub>4</sub> W·2(C <sub>7</sub> H <sub>8</sub> ) | C <sub>58</sub> H <sub>48</sub> Al <sub>2</sub> F <sub>30</sub> MoO <sub>4</sub> P <sub>4</sub> | C <sub>54</sub> H <sub>62</sub> AlF <sub>15</sub> MoNOP <sub>4</sub> |
| cryst syst                                       | Monoclinic                                                                                                          | Monoclinic                                                                                      | Monoclinic                                                           |
| space group                                      | P2 <sub>1</sub> /n                                                                                                  | P2 <sub>1</sub> /n                                                                              | I2/a                                                                 |
| volume (Å <sup>3</sup> )                         | 5581.0(3)                                                                                                           | 4097.5(2)                                                                                       | 12783.9(4)                                                           |
| a (Å)                                            | 13.8441(4)                                                                                                          | 13.8498(4)                                                                                      | 24.8425(4)                                                           |
| b (Å)                                            | 11.8025(3)                                                                                                          | 14.1073(5)                                                                                      | 20.3105(4)                                                           |
| c (Å)                                            | 34.6152(8)                                                                                                          | 21.9884(8)                                                                                      | 27.5805(4)                                                           |
| $\alpha$ (deg)                                   | 90                                                                                                                  | 90                                                                                              | 90                                                                   |
| $\beta$ (deg)                                    | 99.341(2)                                                                                                           | 107.491(3)                                                                                      | 113.272 (2)°                                                         |
| $\gamma$ (deg)                                   | 90                                                                                                                  | 90                                                                                              | 90                                                                   |
| Z                                                | 4                                                                                                                   | 2                                                                                               | 8                                                                    |
| Formula weight (g/mol)                           | 1352.75                                                                                                             | 1652.76                                                                                         | 1272.88                                                              |
| density (g cm <sup>-3</sup> )                    | 1.610                                                                                                               | 1.340                                                                                           | 1.323                                                                |
| Absorption Coeff. (mm <sup>-1</sup> )            | 5.87                                                                                                                | 3.22                                                                                            | 3.45                                                                 |
| F(000)                                           | 2720                                                                                                                | 1652                                                                                            | 5207                                                                 |
| $\theta_{\max}$ (°)                              | 65.1                                                                                                                | 65.1                                                                                            | 65.1                                                                 |
| no. refined reflections                          | 9502                                                                                                                | 6966                                                                                            | 10899                                                                |
| no. refined restraints                           | 0                                                                                                                   | 0                                                                                               | 4                                                                    |
| no. refined parameters                           | 702                                                                                                                 | 438                                                                                             | 703                                                                  |
| wR(F <sup>2</sup> )                              | 0.094                                                                                                               | 0.229                                                                                           | 0.082                                                                |
| R[F <sup>2</sup> > 2 $\sigma$ (F <sup>2</sup> )] | 0.039                                                                                                               | 0.083                                                                                           | 0.030                                                                |

## 5 References

- 1 T. A. George and M. E. Noble, A direct one-step preparation of bis(dinitrogen) complexes of molybdenum(0) from molybdenum(V) chloride, *Inorg. Chem.*, 1978, **17**, 1678–1679.
- 2 J. R. Dilworth, R. L. Richards, G. J.-J. Chen and J. W. McDonald, in *Inorganic Syntheses*, John Wiley & Sons, Ltd, 1990, pp. 33–43.
- 3 R. Poli and H. D. Mui, True nature of trihalotris(tetrahydrofuran)molybdenum(III),  $\text{MoX}_3(\text{THF})_3$  (X = Cl, Br, I). A paramagnetic proton NMR study, *J. Am. Chem. Soc.*, 1990, **112**, 2446–2448.
- 4 F. Stoffelbach, D. Saurens and R. Poli, Improved Preparations of Molybdenum Coordination Compounds from Tetrachlorobis(diethyl ether)molybdenum(IV), *Eur. J. Inorg. Chem.*, 2001, **2001**, 2699–2703.
- 5 A. C. Filippou, G. Schnakenburg, A. I. Philippopoulos and N. Weidemann,  $\text{Ge}_2$  trapped by triple bonds between two metal centers: the germylidyne complexes *trans,trans*-[Cl(depe) $_2$ M $\equiv$ Ge—Ge $\equiv$ M(depe) $_2$ Cl] (M=Mo, W) and bonding analyses of the M $\equiv$ Ge—Ge $\equiv$ M chain, *Angew. Chem. Int. Ed.*, 2005, **44**, 5979–5985.
- 6 A. Simonneau, R. Turrel, L. Vendier and M. Etienne, Group 6 Transition-Metal/Boron Frustrated Lewis Pair Templates Activate  $\text{N}_2$  and Allow its Facile Borylation and Silylation, *Angew. Chem. Int. Ed.*, 2017, **56**, 12268–12272.
- 7 D. Specklin, A. Coffinet, L. Vendier, I. del Rosal, C. Dinoi and A. Simonneau, Synthesis, Characterization, and Comparative Theoretical Investigation of Dinitrogen-Bridged Group 6-Gold Heterobimetallic Complexes, *Inorg. Chem.*, 2021, **60**, 5545–5562.
- 8 S. Feng, G. R. Roof and E. Y.-X. Chen, Tantalum(V)-Based Metallocene, Half-Metallocene, and Non-Metallocene Complexes as Ethylene–1-Octene Copolymerization and Methyl Methacrylate Polymerization Catalysts, *Organometallics*, 2002, **21**, 832–839.
- 9 L. Escomel, F. F. Martins, L. Vendier, A. Coffinet, N. Queyriaux, V. Krewald and A. Simonneau, Coordination of  $\text{Al}(\text{C}_6\text{F}_5)_3$  vs  $\text{B}(\text{C}_6\text{F}_5)_3$  on Group 6 End-On Dinitrogen Complexes: Chemical and Structural Divergences, submitted.
- 10 R. K. Harris, E. D. Becker, S. M. Cabral de Menezes, R. Goodfellow and P. Granger, NMR nomenclature. Nuclear spin properties and conventions for chemical shifts, *Pure Appl. Chem.*, 2001, **73**, 1795–1818.
- 11 R. K. Harris, E. D. Becker, S. M. Cabral de Menezes, P. Granger, R. E. Hoffman and K. W. Zilm, Further conventions for NMR shielding and chemical shifts (IUPAC Recommendations 2008), *Pure Appl. Chem.*, 2008, **80**, 59–84.
- 12 Rafael. Alvarez, Ernesto. Carmona, J. M. Marin, M. L. Poveda, Enrique. Gutierrez-Puebla and Angeles. Monge, Carbon dioxide chemistry. Synthesis, properties, and structural characterization of stable bis(carbon dioxide) adducts of molybdenum, *J. Am. Chem. Soc.*, 1986, **108**, 2286–2294.
- 13 J. A. Buss, D. G. VanderVelde and T. Agapie, Lewis Acid Enhancement of Proton Induced  $\text{CO}_2$  Cleavage: Bond Weakening and Ligand Residence Time Effects, *J. Am. Chem. Soc.*, 2018, **140**, 10121–10125.
- 14 D. H. Gibson, Carbon dioxide coordination chemistry: metal complexes and surface-bound species. What relationships?, *Coord. Chem. Rev.*, 1999, **185–186**, 335–355.
- 15 G. Sheldrick, Institut für Anorganische Chemie der Universität, Tammanstrasse 4, D-3400 Göttingen.
- 16 L. J. Farrugia, WinGX suite for small-molecule single-crystal crystallography, *J. Appl. Crystallogr.*, 1999, **32**, 837–838.
- 17 P. W. Betteridge, J. R. Carruthers, R. I. Cooper, K. Prout and D. J. Watkin, CRYSTALS version 12: software for guided crystal structure analysis, *J. Appl. Crystallogr.*, 2003, **36**, 1487–1487.
- 18 W. Schmitz, International Tables for X-ray Crystallography, vol. IV (Ergänzungsband). Herausgegeben von der International Union of Crystallography. The Kynoch Press, Birmingham,

- England, 1974, 366 Seiten einschließlich Tabellen und Sachwortverzeichnis, *Kristall und Technik*, 1975, **10**, K120–K120.
- 19 C. F. Macrae, I. Sovago, S. J. Cottrell, P. T. A. Galek, P. McCabe, E. Pidcock, M. Platings, G. P. Shields, J. S. Stevens, M. Towler and P. A. Wood, Mercury 4.0: from visualization to analysis, design and prediction, *J. Appl. Crystallogr.*, 2020, **53**, 226–235.
- 20 Neese, F., Software update: The ORCA program system—Version 5.0. Wiley Interdiscip. Rev. Comput. Mol. Sci. 2022, 12, e1606
- 21 Becke, A. D. Density-Functional Exchange-Energy Approximation with Correct Asymptotic-Behavior. *Phys. Rev. A* 1988, **38**, 3098.
- 22 Becke, A. D. Density-Functional Thermochemistry. III. The Role of Exact Exchange. *J. Chem. Phys.* 1993, **98**, 5648
- 23 Weigand, F. Accurate Coulomb-fitting basis sets for H to Rn. *Phys. Chem. Chem. Phys.* 2006, **8**, 1057.
